# Supplementary material for: Circulating Interleukins and Risk of Multiple Sclerosis: A Mendelian Randomization Study
Source: Frontiers journal article supplement (doi:10.3389/fimmu.2021.647588), 2021-04-15
Supplement: Data_Sheet_1.PDF [file Data_Sheet_1.PDF]

**Supplementary Content**

**Supplemental Table 1. Basic information for summary-level datasets utilized in the Mendelian randomization study ..... 2**

**Supplemental Figure S1. Mendelian randomization scatter plot showing the effect of IL-6 on MS..... 3**

**Supplemental Figure S2. Mendelian randomization forest plot showing the effect of IL-6 on MS ..... 4**

**Supplemental Figure S3. Mendelian randomization scatter plot showing the effect of IL-18 on MS. .... 5**

**Supplemental Figure S4. Mendelian randomization forest plot showing the effect of IL-18 on MS..... 6**

**Supplemental Table 1.** Basic information for summary-level datasets utilized in the Mendelian randomization study.

| Phenotype          | Author and Year          | Sample Size<br>(Cases/Controls) | Female (%) | Mean Age at Examination | Population | Main Cohort  | PubMed ID |
|--------------------|--------------------------|---------------------------------|------------|-------------------------|------------|--------------|-----------|
| IL-1Ra             | Herder et al., 2014      | 16,160                          | 47.9%      | 51.3                    | European   | Whitehall II | 24969107  |
| sIL-2R $\alpha$    | Ahola-Olli et al., 2017  | 8,293                           | 47.4%      | 45.3                    | European   | FINRISK      | 27989323  |
| IL-6               | Russell et al., 2020     | 8,296                           | 42.6%      | 43.6                    | European   | SardiNIA     | 32473944  |
| IL-16              | Ahola-Olli et al., 2017  | 8,293                           | 47.4%      | 45.3                    | European   | FINRISK      | 27989323  |
| IL-17              | Ahola-Olli et al., 2017  | 8,293                           | 47.4%      | 45.3                    | European   | FINRISK      | 27989323  |
| IL-18              | Matteini et al., 2014    | 6,135                           | 43.6%      | 50.8                    | European   | CHS          | 24182552  |
| Multiple Sclerosis | Patsopoulos et al., 2018 | 14,802 / 26,703                 | 40.8%      | 45.3                    | European   | IMSGC        | 31604244  |

Abbreviations: IL, interleukin; IL-1Ra, IL-1 receptor antagonist; sIL-2R $\alpha$ , soluble IL-2 receptor  $\alpha$  subunit; FINRISK, Finnish population-based survey on chronic disease risk factors; SardiNIA, Sardinian population-based study by National Institute on Aging; CHS, Cardiovascular Health Study; IMSGC, International Multiple Sclerosis Genetics Consortium.

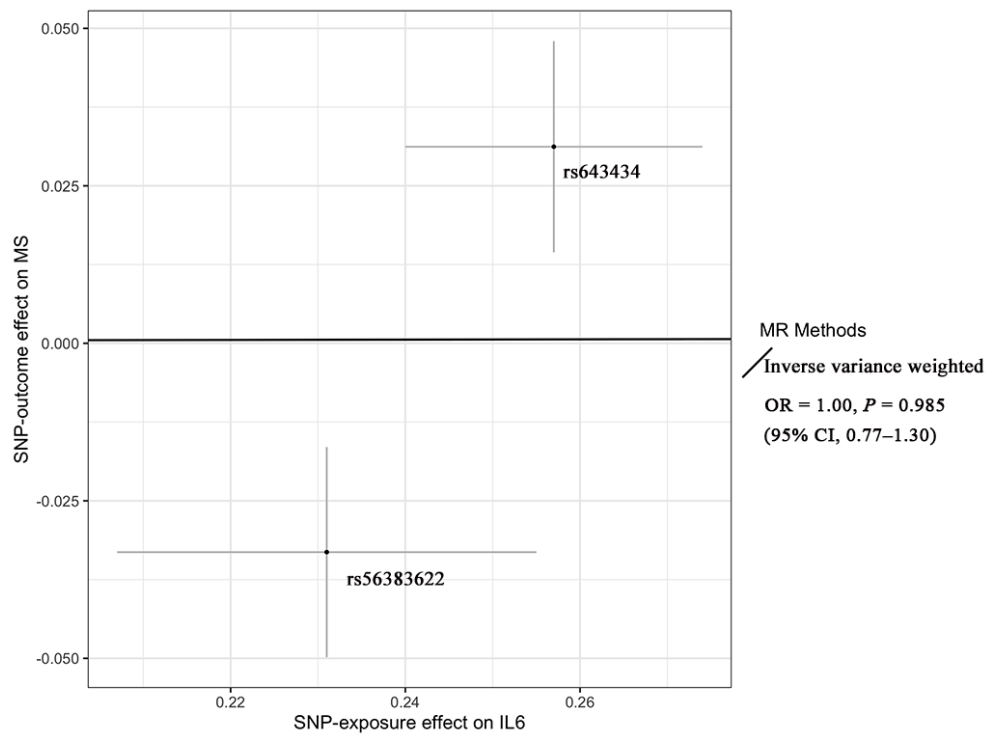

**Figure S1.** Mendelian randomization scatter plot showing the effect of IL-6 on MS. There was no association between circulating concentrations of IL-6 and MR risk (OR=1.00; 95% CI, 0.77-1.30;  $p = 0.985$ ). The causal estimate by the inverse-variance-weighted method was presented as the overall fitted line. Individual SNP-effect on the risk of MS (point and vertical line) against its effect on the IL-6 (point and horizontal line) was delineated in the background. CI, confidence interval; IL-6, interleukin-6; MS, multiple sclerosis; OR, Odds ratio; SNP, Single nucleotide polymorphism.

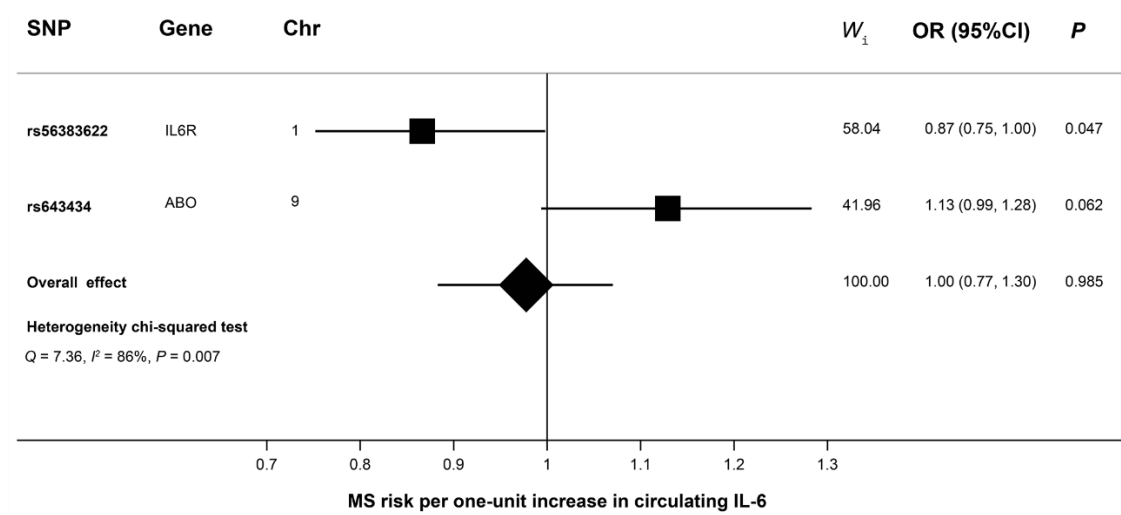

**Figure S2.** Mendelian randomization forest plot showing the effect of IL-6 on MS. Causal estimate of individual SNP was presented using the square box, while the overall estimate was illustrated using the diamond box. Chr, chromosome; CI, confidence interval; IL-6, interleukin-6; MS, multiple sclerosis; OR, Odds ratio; SNP, Single nucleotide polymorphism;  $W_i$ , weight of corresponding SNP in the inverse-variance-weighted MR.

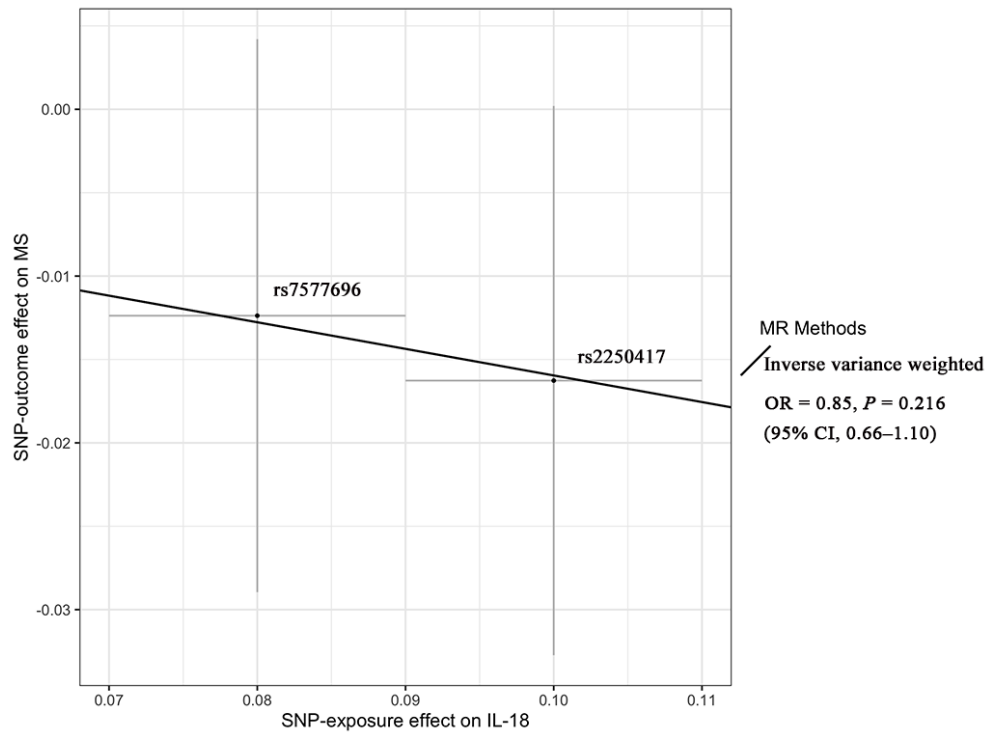

**Figure S3.** Mendelian randomization scatter plot showing the effect of IL-18 on MS. There was no association between circulating concentrations of IL-18 and MR risk (OR=0.85; 95% CI, 0.66-1.10;  $p = 0.216$ ). The causal estimate by the inverse-variance-weighted method was presented as the overall fitted line. Individual SNP-effect on the risk of MS (point and vertical line) against its effect on the IL-18 (point and horizontal line) was delineated in the background. CI, confidence interval; IL-18, interleukin-18; MS, multiple sclerosis; OR, Odds ratio; SNP, Single nucleotide polymorphism.

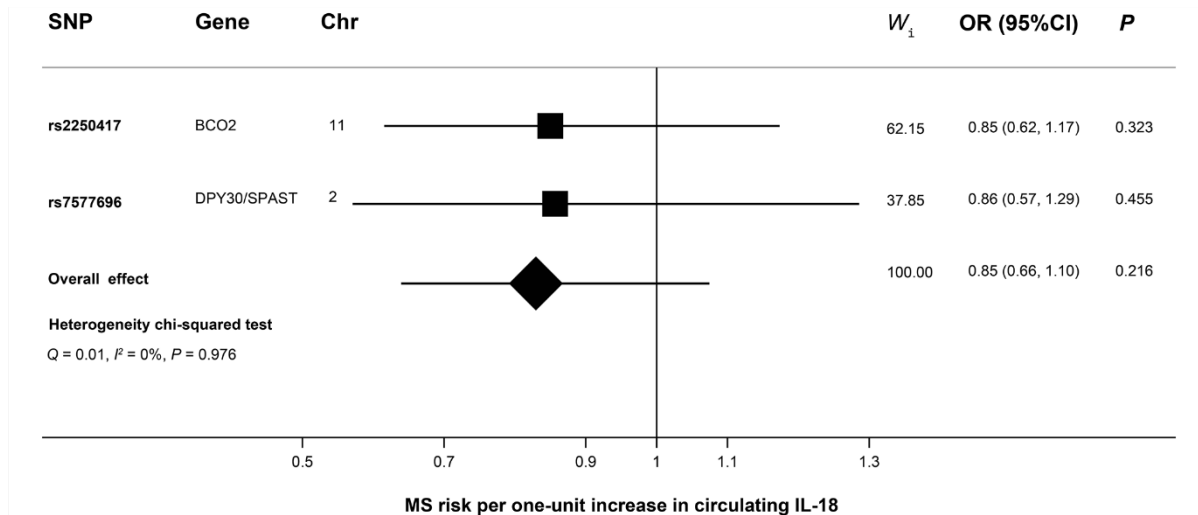

**Figure S4.** Mendelian randomization forest plot showing the effect of IL-18 on MS. Causal estimate of individual SNP was presented using the square box, while the overall estimate was illustrated using the diamond box. Chr, chromosome; CI, confidence interval; IL-18, interleukin-18; MS, multiple sclerosis; OR, Odds ratio; SNP, Single nucleotide polymorphism;  $W_i$ , weight of corresponding SNP in the inverse-variance-weighted MR.
